# Supplementary material
Source: Royal Society of Chemistry journal article supplement (doi:10.1039/d6ay00370b)
Supplement: d6ay00370b1.pdf [file d6ay00370b1.pdf]

*Supporting Information for*

**Construction of Viscosity-Sensitive RNA Fluorescent Probes and  
Exploration of Their Applications in Inflammatory Imaging**

Meini Tang, Enxiang Ge, Guofang Li, Dingkun Xiong Weiyang Lin\*

Institute of Optical Materials and Chemical Biology, Guangxi Key Laboratory of  
Electrochemical Energy Materials, School of Chemistry and Chemical Engineering,  
Guangxi University, Nanning, Guangxi 530004, P. R. China  
Email: [weiyanglin2013@163.com](mailto:weiyanglin2013@163.com)

---

\*Correspondence to: Weiyang Lin, Institute of Optical Materials and Chemical Biology, Guangxi  
Key Laboratory of Electrochemical Energy Materials, School of Chemistry and Chemical  
Engineering, Guangxi University, Nanning, Guangxi 530004, P. R. China  
Email: [weiyanglin2013@163.com](mailto:weiyanglin2013@163.com).

## Table of contents

|                                                                                |           |
|--------------------------------------------------------------------------------|-----------|
| <b>Experimental .....</b>                                                      | <b>3</b>  |
| 1. Equipment and Reagents .....                                                | 3         |
| <b>2. Steps of synthesis.....</b>                                              | <b>3</b>  |
| 2.1 Synthesis route of the fluorescent probe <b>NK-1</b> and <b>NK-2</b> ..... | 3         |
| 2.2 Synthesis procedures of <b>compound 1</b> .....                            | 3         |
| 2.3 Synthesis procedures of <b>compound 2</b> .....                            | 3         |
| <b>3. DFT calculations .....</b>                                               | <b>4</b>  |
| <b>4. Molecular docking.....</b>                                               | <b>4</b>  |
| <b>5. Spectral test method .....</b>                                           | <b>4</b>  |
| 5.1 Optical studies and analysis .....                                         | 4         |
| 5.2 Preparation of PBS buffer solution.....                                    | 4         |
| 5.3 pH buffer system solution configuration.....                               | 4         |
| <b>6. Calculation method of RNA and DNA concentration .....</b>                | <b>4</b>  |
| <b>7. Calculation of Fluorescence Quantum Yield.....</b>                       | <b>4</b>  |
| <b>8. Culture and preparation of HepG2 cells.....</b>                          | <b>5</b>  |
| <b>9 Cytotoxicity assay.....</b>                                               | <b>5</b>  |
| <b>10. RNase digestion experiment.....</b>                                     | <b>5</b>  |
| <b>11. viscosity response experiment .....</b>                                 | <b>6</b>  |
| <b>12. Visualization experiment of cellular inflammation.....</b>              | <b>6</b>  |
| <b>13. Supplementary Figures.....</b>                                          | <b>6</b>  |
| <b>Fig. S1 .....</b>                                                           | <b>8</b>  |
| <b>Fig. S2 .....</b>                                                           | <b>9</b>  |
| <b>Fig. S3 .....</b>                                                           | <b>9</b>  |
| <b>Fig. S4 .....</b>                                                           | <b>9</b>  |
| <b>Fig. S5 .....</b>                                                           | <b>10</b> |
| <b>Fig. S7 .....</b>                                                           | <b>11</b> |
| <b>Fig. S8 .....</b>                                                           | <b>11</b> |
| <b>Fig. S9 .....</b>                                                           | <b>11</b> |
| <b>Fig. S10 .....</b>                                                          | <b>12</b> |
| <b>Fig. S11 .....</b>                                                          | <b>12</b> |
| <b>Fig. S12 .....</b>                                                          | <b>13</b> |
| <b>Fig. S13 .....</b>                                                          | <b>13</b> |
| <b>Fig. S14 .....</b>                                                          | <b>14</b> |
| <b>Reference.....</b>                                                          | <b>14</b> |

## Experimental

### 1. Equipment and Reagents

All the chemical reagents used in this study were purchased from reagent suppliers with proper qualifications and were directly used in the experiments without pre-treatment. The experimental instruments include: UV - Vis spectrophotometer (Model UV - 2700), fluorescence spectrometer (Model F - 4700): Provided by Beijing Branch of Japanese Scientific Instruments Co., Ltd.; Confocal microscope (Model TCS - SP8 CARS); Small animal in vivo imaging system (Model IVIS Lumina Series III).

### 2. Steps of synthesis

#### 2.1 Synthesis route of the fluorescent probe NK-1 and NK-2.

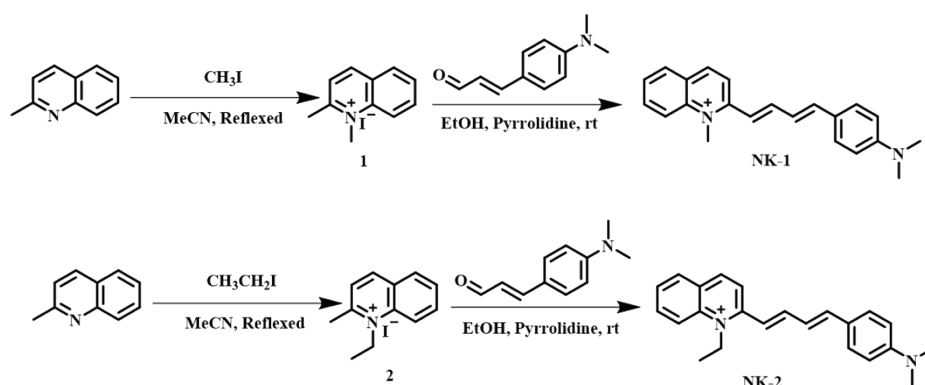

#### 2.2 Synthesis procedures of compound 1

2-Methylquinoline (800 mg, 5.59 mmol) was added to a 25 mL round-bottom flask and dissolved in 5 mL of acetonitrile. Then methyl iodide (0.42 mL, 5.16 mmol) was added, and the mixture was refluxed at 85 °C for 12 h. After the reaction was completed, it was cooled to room temperature, and the product precipitated. The product was filtered and dried, and further purified by recrystallization to obtain a yellow **compound 1** (1.45 g, 91.2%).  $^1\text{H}$  NMR (600 MHz,  $\text{DMSO}-d_6$ )  $\delta$  9.11 (d,  $J = 8.5$  Hz, 1H), 8.60 (dd,  $J = 9.1, 1.1$  Hz, 1H), 8.41 (dd,  $J = 8.1, 1.5$  Hz, 1H), 8.24 (ddd,  $J = 8.8, 7.0, 1.5$  Hz, 1H), 8.14 (dd,  $J = 8.5, 1.4$  Hz, 1H), 8.00 (ddd,  $J = 8.0, 6.9, 0.9$  Hz, 1H), 4.46 (d,  $J = 1.1$  Hz, 3H), 3.10 (d,  $J = 1.8$  Hz, 3H).

#### 2.3 Synthesis procedures of compound 2

2-Methylquinoline (800 mg, 5.59 mmol) was added to a 25 mL round-bottom flask and dissolved in 5 mL of acetonitrile. Then ethyl iodide (0.54 mL, 6.77 mmol) was added, and the mixture was refluxed at 85 °C for 12 h. After the reaction was completed, it was cooled to room temperature, and the product precipitated. The product was filtered and dried, and further purified by recrystallization to obtain a pale yellow **compound 2** (1.48 g, 88.6%).  $^1\text{H}$  NMR (600 MHz,  $\text{DMSO}-d_6$ )  $\delta$  9.12 (d,  $J = 8.5$  Hz, 1H), 8.63 (d,  $J = 9.0$  Hz, 1H), 8.43 (dd,  $J = 8.1, 1.5$  Hz, 1H), 8.24 (ddd,  $J = 8.8, 7.0, 1.6$  Hz, 1H), 8.14 (d,  $J = 8.5$  Hz, 1H), 8.00 (ddd,  $J = 8.0, 7.0, 0.8$  Hz, 1H), 5.01 (q,  $J = 7.3$  Hz, 2H), 3.13 (s, 3H), 1.54 (t,  $J = 7.3$  Hz, 3H).

### 3. DFT calculations

Quantum chemical calculations based on density-functional theory (DFT) and time varying density-functional theory (TD-DFT) were performed using the software Gaussian 09 and the B3LYP/6-31G(d,p) basis set. The initial geometry of the probe **NK-1** and **NK-2** was generated using the software Gaussian View.

#### 4. Molecular docking

Using Autodock technology, perform molecular docking of **NK-1** and **NK-2** with the RNA crystal structure (PDB: 1FJE). Evaluate the binding ability and affinity of the two to RNA by calculating the binding energy, analyzing the binding sites and interaction modes.

#### 5. Spectral test method

##### 5.1 Optical studies and analysis

Sample selectivity test: When investigating the responses of **NK-1** and **NK-2** to DNA and RNA, ions such as GSH, Hcy, Al<sup>3+</sup>, Ca<sup>2+</sup>, Cu<sup>2+</sup>, Mg<sup>2+</sup>, Fe<sup>2+</sup>, HSO<sub>3</sub><sup>-</sup>/SO<sub>3</sub><sup>2-</sup>, ClO<sup>-</sup>, O<sub>2</sub><sup>-</sup>, ONOO<sup>-</sup> were dissolved in PBS for testing. In addition, DNA and RNA were dissolved in PBS buffer solution, and their concentrations were roughly calculated. Then the specific concentrations were calculated by the Lambert-Beer formula and absorption spectrum tests. Spectral test parameters: The detection used 520 nm as the excitation wavelength, and the widths of both the excitation slit and the emission slit were set to 10 nm.

##### 5.2 Preparation of PBS buffer solution

The procured analytical-grade phosphate buffer formulation powder was dissolved in ultrapure water, made up to the mark in a 2 L volumetric flask, the pH of the solution was recorded as 7.55, and autoclaved for use.

##### 5.3 pH buffer system solution configuration

A pH (3.0-8.0) gradient system was constructed by microtitration of 0.1 M HCl/NaOH using PBS as the base buffer, which was confirmed by a pH meter calibration before the experiment.

#### 6. Calculation method of RNA and DNA concentration

RNA and DNA concentration were calculated by follow equation. The ultraviolet absorption intensity stranded for size of the electron energy level transition probability and abides by the lambert-beer's law (1).

$$A = -\log \frac{I}{I_0} = \epsilon cl$$

$A$  stand for absorbance;  $\epsilon$  stand for extinction coefficient, extinction coefficient of RNA is 7700, extinction coefficient of DNA is 6600;  $c$  stand for molar concentration;  $l$  stand for length of sample pool;  $I_0$  and  $I$  stand for intensity of the incident light and transmission light, respectively.

#### 7. Calculation of Fluorescence Quantum Yield

Using Rhodamine B as the reference standard, the fluorescence quantum yields ( $\Phi$ ) of **NK-1** and **NK-2** in various solvents were measured. This operation was carried out in accordance with the  $\Phi$  measurement standard specified for Rhodamine B. The calculation formula for  $\Phi$  is as follows:

$$\Phi_{Sample} = \Phi_{Standard} * \left( \frac{A_{Standard} F_{Sample}}{A_{Sample} F_{Standard}} \right)$$

where  $\Phi$  represents the fluorescence quantum yield,  $F_{Standard}$  represents the integrated area of the fluorescence spectrum of the standard sample,  $F_{Sample}$  represents the integrated area of the fluorescence spectrum of the sample

to be tested,  $A_{\text{Standard}}$  represents the absorbance of the standard sample at the excitation wavelength, and  $A_{\text{sample}}$  represents the absorbance of the sample to be tested at the excitation wavelength.

## 8. Culture and preparation of HepG2 cells

HepG2 cells were cultured in DMEM (Dulbecco's modified Eagle's medium) supplemented with 10% FBS (fetal bovine serum) in an atmosphere of 5% CO<sub>2</sub> and 95% air at 37 °C. Before the experiments, the HepG2 cells in 35-mm glass-bottomed dishes were cultured to a density of  $2 \times 10^5$  cells per dish. Incubate the cells for 24 h. Cells will attach to the glass surface during this time.

## 9 Cytotoxicity assay

The cytotoxicity of **NK-1** and **NK-2** were evaluated on HepG2. Cells were seeded in 96-well plates ( $5 \times 10^3$  cells/well) and incubated for 24 h, and then **NK-1** and **NK-2** (final concentration 0, 1, 2, 5, 10, 20, 30 and 40  $\mu\text{M}$ ) was added to the cell culture medium. The corresponding cells were incubated with or without (control) **NK-1** and **NK-2** for 12 h, followed by the addition of MTT assay (10  $\mu\text{L}$ , 5 mg/mL) for 4 h. The absorption value was measured at 490 nm wavelength by an enzyme labeler. The assays were performed in six sets for each concentration. The cellular viability of each group was determined by defining the absorbance of the controls group to be 100 % viability. The cell viability of different concentrations of probes was calculated according to the formula:

$$\text{Cell viability (\%)} = (A_s - A_b) / (A_c - A_b) \times 100 \%$$

Where  $A_s$  is the absorbance value of the experimental group;

$A_c$  is the absorbance value of the control group;

$A_b$  is the absorbance value of the blank group.

## 10. RNase digestion experiment

Studies have shown that ribonuclease (RNase) digestion experiments are usually used to test the presence or absence of RNA in cells. Composition of the cell culture medium: DMEM: bovine serum albumin: antibiotics (penicillin, streptomycin) = 100:10:1. The cells were cultured in a CO<sub>2</sub> incubator. 24 h before imaging, the cells were transferred to an imaging dish for culture. When the cell culture coverage reaches 70%, place the cell imaging dish on the operating table, added 1 mL of 4% formalin fixative for cell fixation for 3 h. Then, use 5% Triton X-100 for cell permeabilization for 30 min, and then wash with PBS. Added 1 mL of PBS buffer solution and 4  $\mu\text{L}$  of RNase (5 mg/mL) to the experimental group and culture for 2 h. Added 1004  $\mu\text{L}$  of PBS to the control group and culture for 2 h. Added **NK-1** and **NK-2** respectively and incubate for 30 min, then wash with PBS solution. After washing, removed the PBS and added new PBS for imaging.

## 11. viscosity response experiment

HepG2 cells were incubated with nystatin (10  $\mu\text{M}$ ) and Cu<sup>2+</sup> (10  $\mu\text{M}$ ) for 30 min and then incubated with the probe **NK-1** and **NK-2** for 30 min. Before performing upright and inverted imaging, the cultured cells probed with **NK-1** and **NK-2** were rinsed twice with PBS buffer.  $\lambda_{\text{ex}} = 640 \text{ nm}$ ,  $\lambda_{\text{em}} = 690 \text{ nm}$ .

## 12. Visualization experiment of cellular inflammation

For cellular viscosity change, the first group of HepG2 cells was cultured with 0.5 mg/mL, 1 mg/mL, 1 mg/mL LPS and 2  $\mu$ M Dex, and the second group of HepG2 cells was cultured with 1  $\mu$ M Rap, 2  $\mu$ M Rap, 2  $\mu$ M Rap and 2  $\mu$ M Dex. Before upright and inverted imaging, the cultured cells probed with **NK-1** and **NK-2** were washed twice with PBS buffer.  $\lambda_{ex}$  = 640 nm,  $\lambda_{em}$  = 690 nm.

## 13. Supplementary Figures

**Table S1 Comparison of the probe in this work with the reported probes for Viscosity/RNA (From 2024 to 2026).**

| Probe structure                                                                                                      | $\lambda_{ex}/\lambda_{em}$<br>(nm)                          | Targeted location    | Fluorescence enhancement multiplier                                                                                                    | Application                                         | Ref.      |
|----------------------------------------------------------------------------------------------------------------------|--------------------------------------------------------------|----------------------|----------------------------------------------------------------------------------------------------------------------------------------|-----------------------------------------------------|-----------|
| 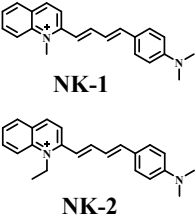 <p><b>NK-1</b><br/><b>NK-2</b></p> | <p><b>NK-1:</b><br/>520/650<br/><b>NK-2:</b><br/>520/650</p> | Nucleolus            | <p>Viscosity of<br/><b>NK-1:</b> 228-fold/<br/><b>NK-2:</b> 190-fold<br/>RNA of<br/><b>NK-1:</b> 30-fold/<br/><b>NK-2:</b> 26-fold</p> | Living cells                                        | This work |
|  <p><b>YY-2</b></p>               | 610/706                                                      | Nuclear              | Viscosity: 289-fold                                                                                                                    | Living cells                                        | 1         |
|  <p><b>CSTS</b></p>               | 680/705                                                      | Cell membrane        | /                                                                                                                                      | Living cells/<br>zebrafish<br>inflammation<br>model | 2         |
|  <p><b>probe 1</b></p>            | 457/530                                                      | Nucleolus            | RNA: 28.9-fold                                                                                                                         | Living cells                                        | 3         |
|  <p><b>HQBT</b></p>               | 370/570                                                      | Lysosome/<br>Nuclear | DNA: 6-fold/<br>RNA: 33-fold                                                                                                           | Living cells                                        | 4         |
|  <p><b>1b</b></p>                 | 521/709                                                      | Mitochondrion        | DNA: 143-fold/<br>RNA: 127-fold                                                                                                        | Living cells                                        | 5         |

|                     |         |                                |                                                                            |              |   |
|---------------------|---------|--------------------------------|----------------------------------------------------------------------------|--------------|---|
| <p><b>TPE1</b></p>  | 305/468 | /                              | DNA: 5-fold/<br>RNA: 5-fold                                                | Living cells | 6 |
| <p><b>Nu-AN</b></p> | 460/529 | Nucleolar                      | Viscosity: 4-fold/<br>dsDNA: 4.7-fold/<br>ssDNA: 2.4-fold/<br>RNA: 22-fold | Living cells | 7 |
| <p><b>NPn</b></p>   | 405/580 | Plasma<br>membrane/<br>Nuclear | DNA: 7.5-fold/<br>RNA: 4.5-fold                                            | Living cells | 8 |
| <p><b>SYN</b></p>   | 440/500 | Mitochondrion<br>/Nucleolar    | Viscosity: 15-fold/<br>DNA: 99-fold/<br>RNA: 113-fold                      | Living cells | 9 |

**Table S2. The fluorescence quantum yield ( $\Phi$ ) of NK-1 in various solvents.**

| Solvents    | $\lambda_{ex}/nm$ | $F_{sample}$ | $F_{standard}$ | $\Phi/\%$ |
|-------------|-------------------|--------------|----------------|-----------|
| EtOH        | 536 nm            | 16182.247    | 505575.857     | 1.00      |
| DMSO        | 525 nm            | 6988.466     | 486929.118     | 0.44      |
| MeCN        | 520 nm            | 14913.491    | 491719.014     | 0.95      |
| THF         | 540 nm            | 13901.092    | 488133.90      | 0.88      |
| PBS         | 502 nm            | 6649.492     | 485843.22      | 0.43      |
| 1,4-Dioxane | 530 nm            | 57856.332    | 484295.833     | 3.77      |
| MeOH        | 527 nm            | 8815.441     | 493088.608     | 0.55      |
| DMF         | 528 nm            | 16628.764    | 485835.532     | 1.08      |
| Glycerol    | 540 nm            | 113303.541   | 486843.22      | 7.79      |

**Table S3. The fluorescence quantum yield ( $\Phi$ ) of NK-2 in various solvents.**

| Solvents | $\lambda_{ex}/nm$ | $F_{sample}$ | $F_{standard}$ | $\Phi/\%$ |
|----------|-------------------|--------------|----------------|-----------|
|----------|-------------------|--------------|----------------|-----------|

|             |        |            |            |      |
|-------------|--------|------------|------------|------|
| EtOH        | 542 nm | 18858.236  | 484581.22  | 1.23 |
| DMSO        | 540 nm | 14210.639  | 482683088  | 0.93 |
| MeCN        | 524 nm | 4981.417   | 481968.715 | 0.32 |
| THF         | 545 nm | 9320.512   | 479603.953 | 1.24 |
| PBS         | 500 nm | 22283.703  | 480225.812 | 1.43 |
| 1,4-Dioxane | 537 nm | 24052.831  | 480054.357 | 1.58 |
| MeOH        | 537 nm | 13360.906  | 483494.698 | 0.87 |
| DMF         | 537 nm | 8174.966   | 484028.095 | 0.53 |
| Glycerol    | 540 nm | 147162.182 | 480658.40  | 9.68 |

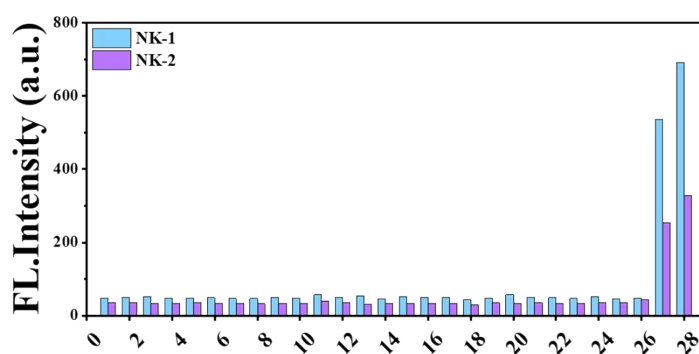

**Fig. S1** Fluorescence properties of probe **NK-1** (10  $\mu$ M) and probe **NK-2** (10  $\mu$ M) in different analyses. From left to right: (1) Blank, (2) Ala, (3) Glu, (4) Arg, (5) Ser, (6) His, (7) GSH, (8) Hcy, (9)  $\text{Al}^{3+}$ , (10)  $\text{Ca}^{2+}$ , (11)  $\text{Cu}^{2+}$ , (12)  $\text{Mg}^{2+}$ , (13)  $\text{Fe}^{2+}$ , (14)  $\text{Fe}^{3+}$ , (15)  $\text{K}^+$ , (16)  $\text{Mn}^{2+}$ , (17)  $\text{Na}^+$ , (18)  $\text{Zn}^{2+}$ , (19)  $\text{HCO}_3^-/\text{CO}_3^{2-}$ , (20)  $\text{HSO}_3^-/\text{SO}_3^{2-}$ , (21)  $\text{ClO}^-$ , (22)  $\text{H}_2\text{O}_2$ , (23)  $\cdot\text{OH}$ , (24)  $\text{HS}^-$ , (25)  $\text{O}_2^-$ , (26)  $\text{ONOO}^-$ , (27) RNA, (28) DNA. All analyses: 100  $\mu$ M.  $\lambda_{\text{ex}} = 520$  nm,  $\lambda_{\text{em}} = 540$  nm.

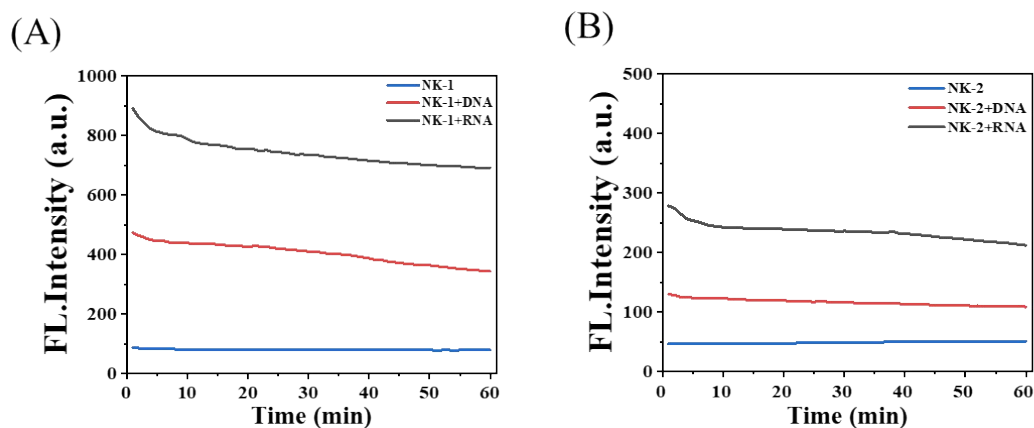

**Fig. S2** (A) Photostability of **NK-1** (10  $\mu$ M) under constant laser irradiation (60 min). (B) Photostability of **NK-2** (10  $\mu$ M) under constant laser irradiation (60 min).

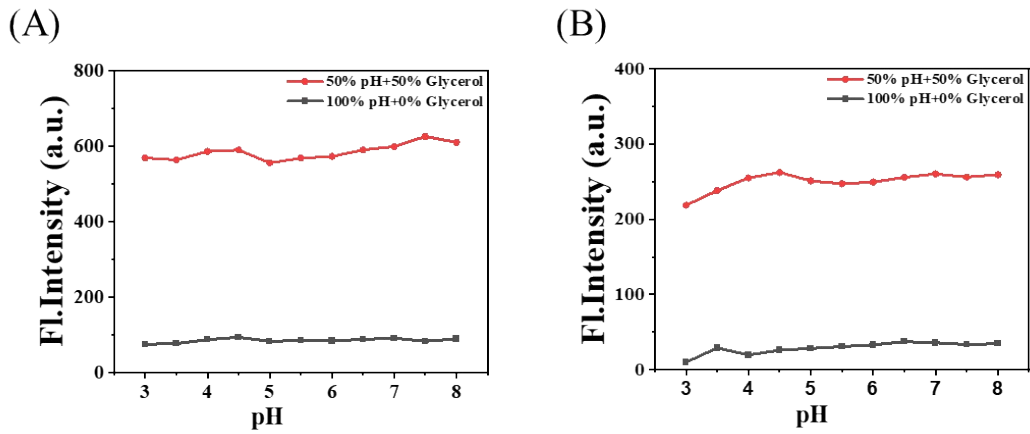

Fig. S3 (A) Fluorescence intensity of **NK-1** (10 μM) in different viscosity and pH systems. (B) Fluorescence intensity of **NK-2** (10 μM) in different viscosity and pH systems.

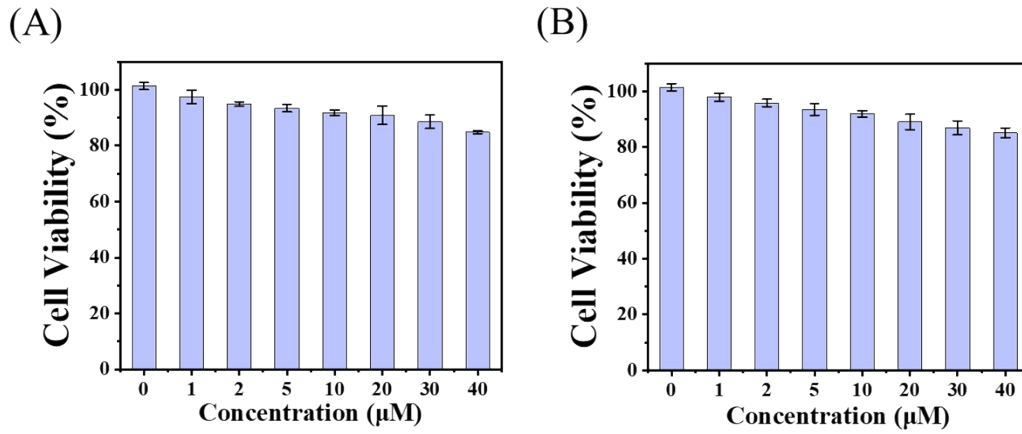

Fig. S4 (A) 12 h Cytotoxicity tests of **NK-1** in HepG2 cells. (B) 12 h Cytotoxicity tests of **NK-2** in HepG2 cells.

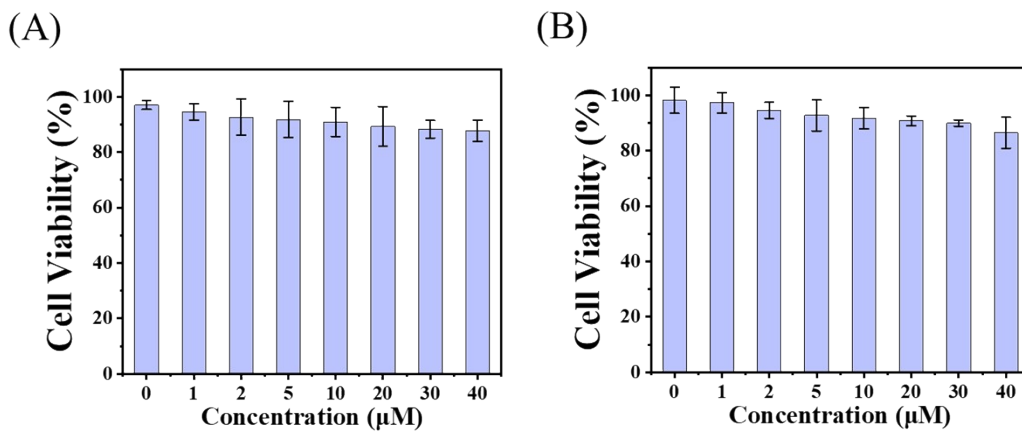

Fig. S5 (A) 24 h Cytotoxicity tests of **NK-1** in HepG2 cells. (B) 24 h Cytotoxicity tests of **NK-2** in HepG2 cells.

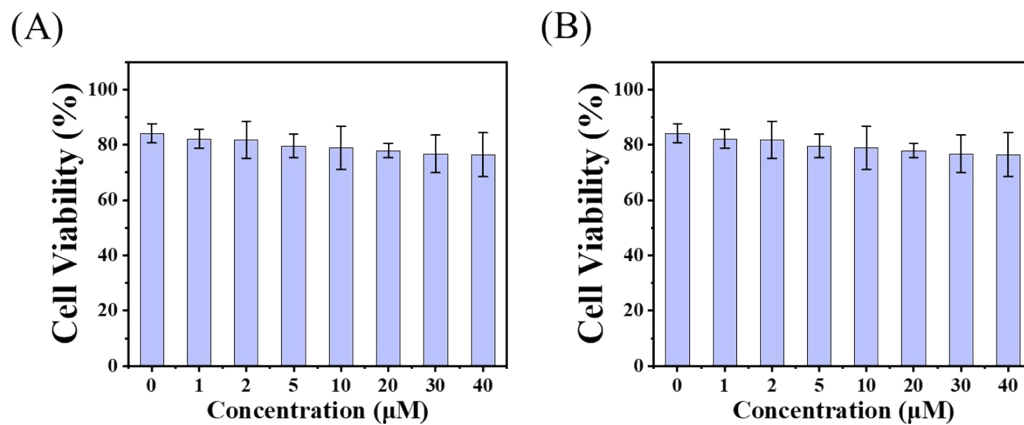

Fig. S6 (A) 48 h Cytotoxicity tests of NK-1 in HepG2 cells. (B) 48 h Cytotoxicity tests of NK-2 in HepG2 cells.

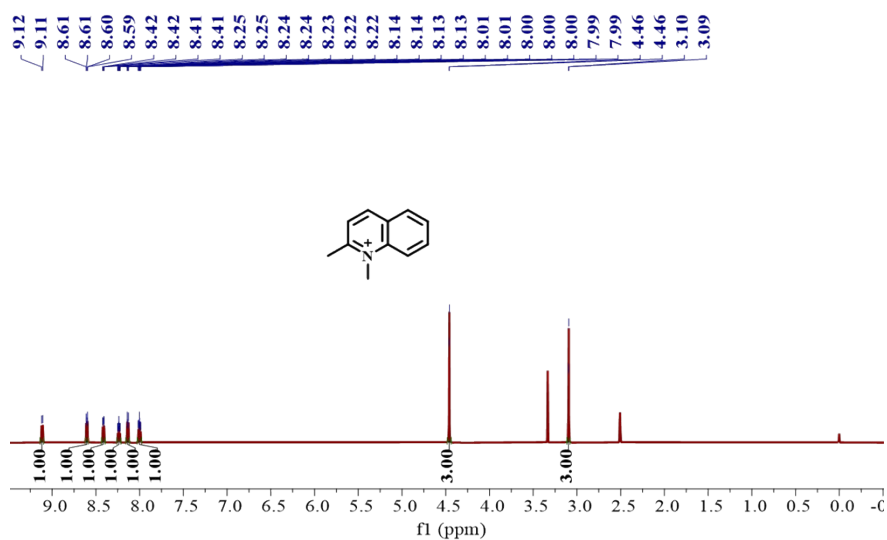

Fig. S7 <sup>1</sup>H NMR spectra of compound 1 in DMSO-*d*<sub>6</sub>.



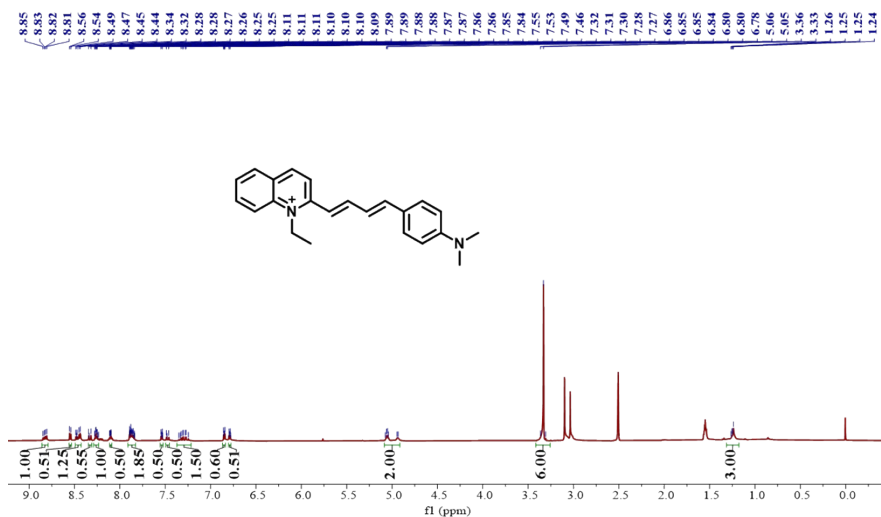

Fig. S10 <sup>1</sup>H NMR spectra of NK-2 in DMSO-*d*<sub>6</sub>.

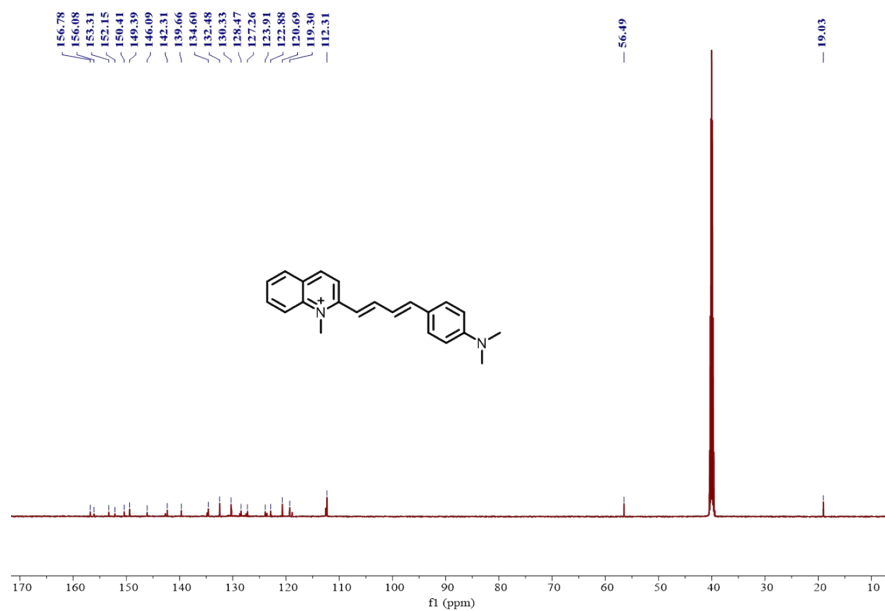

Fig. S11 <sup>13</sup>C NMR spectra of NK-1 in DMSO-*d*<sub>6</sub>.

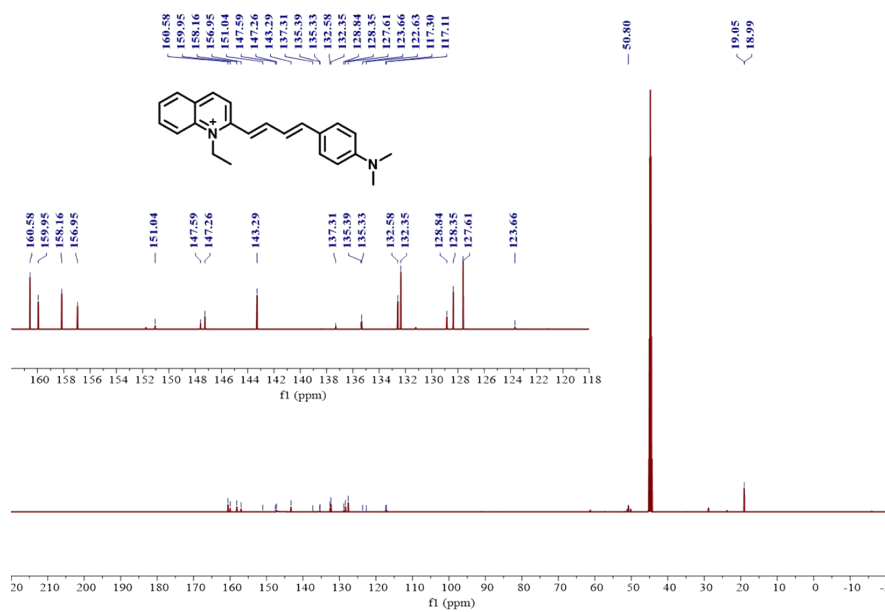

Fig. S12 <sup>13</sup>C NMR spectra of NK-2 in DMSO-*d*<sub>6</sub>.

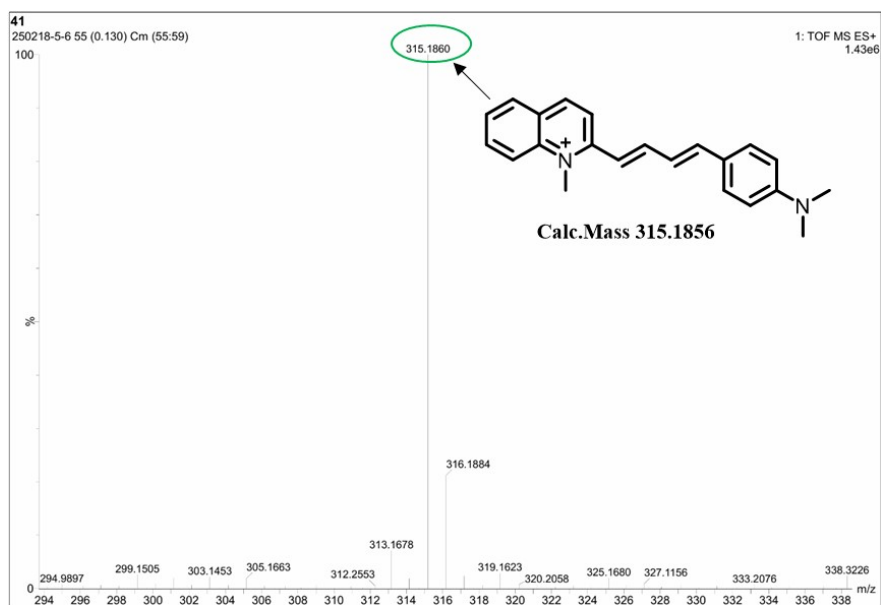

Fig. S13 HR-MS spectrum of NK-1.

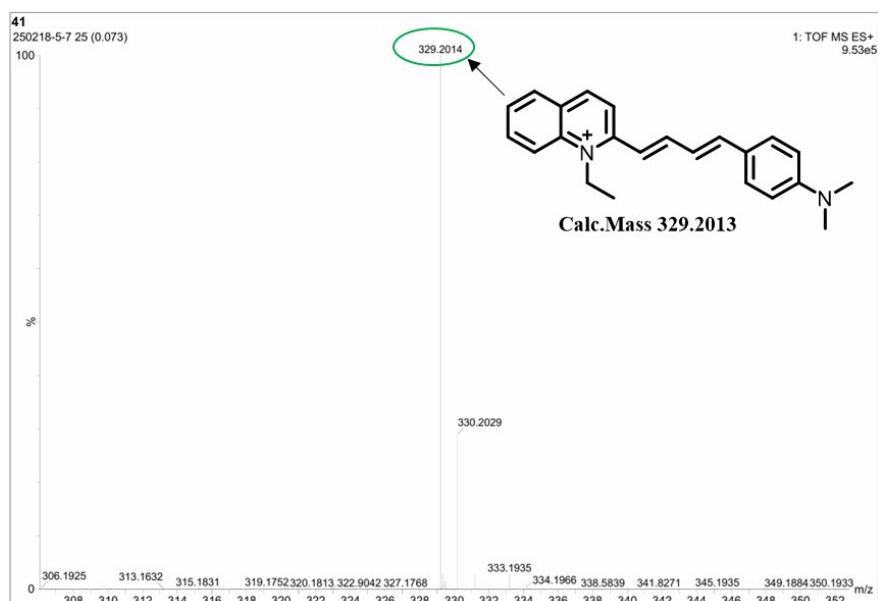

Fig. S14 HR-MS spectrum of NK-2.

## Reference

1. J. Yu, H. Zhang, S. Yuan, C. Sun, L. Zhang, C. Luo and Q. Wang, *Analytical Chemistry*, 2026, **98**, 2060-2069.
2. Z. Gong, P. Yuan, Y. Tang, K. Li, Z. Liu, Y. Wang, S. Zhong and Y. Yang, *Sensors and Actuators B: Chemical*, 2026, **457**, 139738.
3. W. Jiang, J. Chen, Y. Ruan, X. Wang, Q. Qiao and Z. Xu, *ACS Sensors*, 2025, **10**, 5266-5275.
4. D. Wang, W. Huang, Y. Zhu, Z. Yu, Y. Zhou, Y. Chen, Z. Feng, X. Tian, G. Han and Z. Zhang, *Analytical Chemistry*, 2025, **97**, 2359-2366.
5. H. Ma, W. P. Ni, Q. Lin, R. Sun and J. F. Ge, *Analyst*, 2025, **150**, 642-649.
6. S. Adak, S. A. Rahaman, S. Karmakar and S. Bandyopadhyay, *Chemistry – An Asian Journal*, 2024, **19**, e202400400.
7. W. Jiang, Q. Qiao, J. Chen, P. Bao, Y. Tao, Y. Zhang and Z. Xu, *Advanced Science*, 2024, **11**, 2309743.
8. W. Ge, H. Wang, X. Wu, B. Dong, Q. Lu and M. Tian, *Spectrochimica Acta Part A: Molecular and Biomolecular Spectroscopy*, 2024, **313**, 124095.
9. Y. Wang, Q. Lin, Y. Liu, C. Li, Z. Liu, X. Yu and K. N. Wang, *Analytical Chemistry*, 2024, **96**, 9808-9816.
10. Z. Wang, Y. Liu, W. Wang, C. Zhao and W. Lin, *New Journal of Chemistry*, 2021, **45**, 2614-2619.
11. Y. Guo, H. Huang, Q. Zhang, H. Wang, M. Liu and W. Lin, *Analytica Chimica Acta*, 2025, **1350**, 343863.
12. M. Tian, J. Sun, B. Dong and W. Lin, *Angewandte Chemie International Edition*, 2018, **57**, 16506-16510.
